# Supplementary material
Source: PubMed Central journal article supplement (PMC5439214)
Supplement: NIHMS837994-supplement-1.pdf [file NIHMS837994-supplement-1.pdf]

**Supplemental Table 1. Alpha primers**

| TARGET GENE   | PRIMER ORIENTATION | SEQUENCE                                                    | RE CUT SITE | T <sub>m</sub> |
|---------------|--------------------|-------------------------------------------------------------|-------------|----------------|
| TRAV1-1       | Forward            | CGGTTTCAGCAGGAATGCCtacgtaATGTGGGGAGCTTTCCTTCTCTATGTTT       | SnaBI       | 71.6           |
| TRAV1-2       | Forward            | CGGTTTCAGCAGGAATGCCtacgtaATGTGGGGAGTTTTCCTTCTTTATGTTTC      | SnaBI       | 70.7           |
| TRAV2         | Forward            | CGGTTTCAGCAGGAATGCCtacgtaATGGCTTTGCAGAGCACTCTGG             | SnaBI       | 72.5           |
| TRAV3         | Forward            | CGGTTTCAGCAGGAATGCCtacgtaATGGCCTCTGCACCCATCTCG              | SnaBI       | 73.6           |
| TRAV4         | Forward            | CGGTTTCAGCAGGAATGCCtacgtaATGAGGCAAGTGGCGAGAGTGATC           | SnaBI       | 73.0           |
| TRAV5         | Forward            | CGGTTTCAGCAGGAATGCCtacgtaATGAAGACATTTGCTGGATTTTCGTTTC       | SnaBI       | 70.2           |
| TRAV6         | Forward            | CGGTTTCAGCAGGAATGCCtacgtaATGGAGTCACTCTGGGAGGTGTTT           | SnaBI       | 72.0           |
| TRAV7         | Forward            | CGGTTTCAGCAGGAATGCCtacgtaATGGAGAAGATGCGGAGACCTGTC           | SnaBI       | 73.0           |
| TRAV8-1       | Forward            | CGGTTTCAGCAGGAATGCCtacgtaATGCTCCTGTTGCTCATAACCAGTGC         | SnaBI       | 72.9           |
| TRAV8-2       | Forward            | CGGTTTCAGCAGGAATGCCtacgtaATGCTCCTGCTGCTCGTCCC               | SnaBI       | 73.8           |
| TRAV8-3       | Forward            | CGGTTTCAGCAGGAATGCCtacgtaATGCTCCTGGAGCTTATCCCCTG            | SnaBI       | 73.0           |
| TRAV8-7       | Forward            | CGGTTTCAGCAGGAATGCCtacgtaATGCTCTTAGTGGTCACTCTGCTGCTT        | SnaBI       | 71.8           |
| TRAV9-1       | Forward            | CGGTTTCAGCAGGAATGCCtacgtaATGAATCTTCTCCAGGACCAGCG            | SnaBI       | 72.2           |
| TRAV9-2       | Forward            | CGGTTTCAGCAGGAATGCCtacgtaATGAACTATCTCCAGGCTTAGTATCTTGATACTC | SnaBI       | 72.1           |
| TRAV10        | Forward            | CGGTTTCAGCAGGAATGCCtacgtaATGAAAAAGCATCTGACGACCTTCTTG        | SnaBI       | 71.0           |
| TRAV12-1      | Forward            | CGGTTTCAGCAGGAATGCCtacgtaATGATATCCTTGAGAGTTTTACTGGTGATCC    | SnaBI       | 71.3           |
| TRAV12-2      | Forward            | CGGTTTCAGCAGGAATGCCtacgtaATGATGAAATCCTTGAGAGTTTTACTAGTGATCC | SnaBI       | 70.9           |
| TRAV12-3      | Forward            | CGGTTTCAGCAGGAATGCCtacgtaATGATGAAATCCTTGAGAGTTTTACTGGTG     | SnaBI       | 70.6           |
| TRAV13-1      | Forward            | CGGTTTCAGCAGGAATGCCtacgtaATGACATCCATTCGAGCTGTATTATATTC      | SnaBI       | 70.5           |
| TRAV13-2      | Forward            | CGGTTTCAGCAGGAATGCCtacgtaATGGCAGGCACTTCGAGCTTATTT           | SnaBI       | 70.5           |
| TRAV14        | Forward            | CGGTTTCAGCAGGAATGCCtacgtaATGTCACCTTCTAGCCTGCTGAAGGTG        | SnaBI       | 72.6           |
| TRAV16        | Forward            | CGGTTTCAGCAGGAATGCCtacgtaATGAAGCCCACCCATCTCAGTG             | SnaBI       | 73.0           |
| TRAV17        | Forward            | CGGTTTCAGCAGGAATGCCtacgtaATGGAAACTCTCCGGGAGTGTCTTTG         | SnaBI       | 72.6           |
| TRAV18        | Forward            | CGGTTTCAGCAGGAATGCCtacgtaATGCTGTCTGCTTCTCTGCTCAGG           | SnaBI       | 73.2           |
| TRAV19        | Forward            | CGGTTTCAGCAGGAATGCCtacgtaATGCTGACTGCCAGCCGTGTTGAG           | SnaBI       | 73.2           |
| TRAV20        | Forward            | CGGTTTCAGCAGGAATGCCtacgtaATGGAGAAAATGTTGGAGTGTGCAATC        | SnaBI       | 71.0           |
| TRAV21        | Forward            | CGGTTTCAGCAGGAATGCCtacgtaATGGAGACCCTCTTGGGCCTG              | SnaBI       | 73.6           |
| TRAV22        | Forward            | CGGTTTCAGCAGGAATGCCtacgtaATGAAGAGGATATTGGGAGCTCTGCT         | SnaBI       | 71.9           |
| TRAV23        | Forward            | CGGTTTCAGCAGGAATGCCtacgtaATGGACAAGATCTTAGGAGCATATTTTAG      | SnaBI       | 70.5           |
| TRAV24        | Forward            | CGGTTTCAGCAGGAATGCCtacgtaATGGAGAAGAATCCTTTGGCAGCC           | SnaBI       | 72.2           |
| TRAV25        | Forward            | CGGTTTCAGCAGGAATGCCtacgtaATGCTACTCATCACATCAATGTTGGTCTTAT    | SnaBI       | 70.5           |
| TRAV26-1      | Forward            | CGGTTTCAGCAGGAATGCCtacgtaATGAGGCTGGTGGCAAGAGTAACTG          | SnaBI       | 72.9           |
| TRAV26-2      | Forward            | CGGTTTCAGCAGGAATGCCtacgtaATGAAGTTGGTGACAAGCATTACTGTACTCC    | SnaBI       | 72.0           |
| TRAV27        | Forward            | CGGTTTCAGCAGGAATGCCtacgtaATGGTCTGAAATCTCCGTGTCC             | SnaBI       | 72.2           |
| TRAV29        | Forward            | CGGTTTCAGCAGGAATGCCtacgtaATGGCCATGCTCCTGGGGG                | SnaBI       | 74.0           |
| TRAV30        | Forward            | CGGTTTCAGCAGGAATGCCtacgtaATGGAGACTCTCCTGAAAGTGCTTTTTCAG     | SnaBI       | 72.4           |
| TRAV34        | Forward            | CGGTTTCAGCAGGAATGCCtacgtaATGGAGACTGTTCTGCAAGTACTCCTAGG      | SnaBI       | 73.1           |
| TRAV35        | Forward            | CGGTTTCAGCAGGAATGCCtacgtaATGCTCCTTGAACATTTATTAATAATCTTGTGG  | SnaBI       | 69.6           |
| TRAV36        | Forward            | CGGTTTCAGCAGGAATGCCtacgtaATGATGAAGTGTCCACAGGCTTACTAGC       | SnaBI       | 72.3           |
| TRAV38-1      | Forward            | CGGTTTCAGCAGGAATGCCtacgtaATGACACGAGTTAGCTTGTGTGGG           | SnaBI       | 72.9           |
| TRAV38-2      | Forward            | CGGTTTCAGCAGGAATGCCtacgtaATGGCATGCCCTGGCTTCCT               | SnaBI       | 72.9           |
| TRAV39        | Forward            | CGGTTTCAGCAGGAATGCCtacgtaATGAAGAAGCTACTAGCAATGATTCTGTGG     | SnaBI       | 71.4           |
| TRAV40        | Forward            | CGGTTTCAGCAGGAATGCCtacgtaATGAACCTCTCTGGACTTCTAATTTCTGA      | SnaBI       | 71.3           |
| TRAV41        | Forward            | CGGTTTCAGCAGGAATGCCtacgtaATGGTGAAGATCCGGCAATTTTG            | SnaBI       | 70.5           |
| TRAC External | Reverse            | CAGACAGACTTGTCACTGGATTAGAGTCTC                              |             | 61.6           |
| TRAC Internal | Reverse            | CAGCTGGTACAccgeggGGTCAGGGTCTG                               | SacII       | 69.7           |
| TRAV Adaptor  | Forward            | CGGTTTCAGCAGGAATGCCtacgtaATG                                | SnaBI       | 61.2           |

\*Lower case letters within the primer sequences indicate the incorporated restriction enzyme cut sites

**Supplemental Table 2. Beta primers/RT primers/HLA-typing primers**

| TARGET GENE            | PRIMER ORIENTATION | SEQUENCE                                               | RE CUT SITE | Tm   |
|------------------------|--------------------|--------------------------------------------------------|-------------|------|
| TRBV2                  | Forward            | CAGAAGACGGCATAACGAGATcaattgATGGATACTGGCTCGTATGCTGG     | MfeI        | 71.9 |
| TRBV3-1                | Forward            | CAGAAGACGGCATAACGAGATcaattgATGGGCTGCAGGTCCTCTG         | MfeI        | 72.5 |
| TRBV4-1                | Forward            | CAGAAGACGGCATAACGAGATcaattgATGGGCTGCAGGTCCTCTG         | MfeI        | 72.5 |
| TRBV5-1                | Forward            | CAGAAGACGGCATAACGAGATcaattgATGGGCTCCAGGTCCTCTGTT       | MfeI        | 72.2 |
| TRBV5-3                | Forward            | CAGAAGACGGCATAACGAGATcaattgATGGGCCCCGGGCTCC            | MfeI        | 73.2 |
| TRBV5-4                | Forward            | CAGAAGACGGCATAACGAGATcaattgATGGGCCCTGGGTCCTCT          | MfeI        | 72.7 |
| TRBV5-8                | Forward            | CAGAAGACGGCATAACGAGATcaattgATGGGACCCAGGTCCTCTTCT       | MfeI        | 72.2 |
| TRBV6-1                | Forward            | CAGAAGACGGCATAACGAGATcaattgATGAGCATCGGGTCCTGTGC        | MfeI        | 72.3 |
| TRBV6-2                | Forward            | CAGAAGACGGCATAACGAGATcaattgATGAGCCTCGGGTCCTGTG         | MfeI        | 72.5 |
| TRBV6-4                | Forward            | CAGAAGACGGCATAACGAGATcaattgATGAGAATCAGGTCCTGTGCTGTG    | MfeI        | 71.8 |
| TRBV6-6                | Forward            | CAGAAGACGGCATAACGAGATcaattgATGAGCATCAGCCTCCTGTGCTG     | MfeI        | 72.0 |
| TRBV7-1                | Forward            | CAGAAGACGGCATAACGAGATcaattgATGGGCACAAGGTCCTCTGC        | MfeI        | 72.3 |
| TRBV7-2                | Forward            | CAGAAGACGGCATAACGAGATcaattgATGGGCACCAGGTCCTCTTCT       | MfeI        | 72.2 |
| TRBV7-3                | Forward            | CAGAAGACGGCATAACGAGATcaattgATGGGCACCAGGTCCTCTG         | MfeI        | 72.5 |
| TRBV7-6                | Forward            | CAGAAGACGGCATAACGAGATcaattgATGGGCACCAGTCTCCTATGCTG     | MfeI        | 72.0 |
| TRBV7-7                | Forward            | CAGAAGACGGCATAACGAGATcaattgATGGGTACCAGTCTCCTATGCTGGG   | MfeI        | 72.6 |
| TRBV7-9                | Forward            | CAGAAGACGGCATAACGAGATcaattgATGGGCACCAGCCTCCTCTG        | MfeI        | 72.5 |
| TRBV9                  | Forward            | CAGAAGACGGCATAACGAGATcaattgATGGGCTCAGGTCCTCTGCT        | MfeI        | 72.2 |
| TRBV10-1               | Forward            | CAGAAGACGGCATAACGAGATcaattgATGGGCACGAGGCTCTTCTTCTATG   | MfeI        | 71.8 |
| TRBV10-2               | Forward            | CAGAAGACGGCATAACGAGATcaattgATGGGCACCAGGCTCTTCTTCTATG   | MfeI        | 71.8 |
| TRBV10-3               | Forward            | CAGAAGACGGCATAACGAGATcaattgATGGGCACAAGGTTGTTCTTCTATGTG | MfeI        | 70.7 |
| TRBV11-1               | Forward            | CAGAAGACGGCATAACGAGATcaattgATGAGCACCAGGTTCTCTGCTG      | MfeI        | 72.0 |
| TRBV11-3               | Forward            | CAGAAGACGGCATAACGAGATcaattgATGGGTACCAGGTCCTCTGCTG      | MfeI        | 72.9 |
| TRBV12-3               | Forward            | CAGAAGACGGCATAACGAGATcaattgATGAGCTCAGGTCCTCTGCTGT      | MfeI        | 71.9 |
| TRBV12-4               | Forward            | CAGAAGACGGCATAACGAGATcaattgATGGACTCCTGGACCTCTGCTG      | MfeI        | 72.9 |
| TRBV12-5               | Forward            | CAGAAGACGGCATAACGAGATcaattgATGGCCACCAGGTCCTCTG         | MfeI        | 72.5 |
| TRBV13                 | Forward            | CAGAAGACGGCATAACGAGATcaattgATGCTTAGTCTGACCTGCCTGACTC   | MfeI        | 72.4 |
| TRBV14                 | Forward            | CAGAAGACGGCATAACGAGATcaattgATGGTTCCAGGTTCTCAGTTTAGTGT  | MfeI        | 70.6 |
| TRBV15                 | Forward            | CAGAAGACGGCATAACGAGATcaattgATGGGTCCTGGGCTTCTCCACT      | MfeI        | 72.2 |
| TRBV16                 | Forward            | CAGAAGACGGCATAACGAGATcaattgATGAGCCCAATTCACCTGCATCA     | MfeI        | 70.2 |
| TRBV17                 | Forward            | CAGAAGACGGCATAACGAGATcaattgATGGATACTGGCTCCTCTGCTGG     | MfeI        | 71.9 |
| TRBV18                 | Forward            | CAGAAGACGGCATAACGAGATcaattgATGGACACCAGAGTACTCTGCTGTGC  | MfeI        | 72.4 |
| TRBV19                 | Forward            | CAGAAGACGGCATAACGAGATcaattgATGAGCAACCAGGTGCTCTGCTG     | MfeI        | 72.0 |
| TRBV20                 | Forward            | CAGAAGACGGCATAACGAGATcaattgATGCTGTGCTTCTGCTGCTTCT      | MfeI        | 71.2 |
| TRBV24-1               | Forward            | CAGAAGACGGCATAACGAGATcaattgATGGCCTCCCTGCTCTTCTTCTG     | MfeI        | 72.0 |
| TRBV25-1               | Forward            | CAGAAGACGGCATAACGAGATcaattgATGACTATCAGGTCCTCTGCTACATGG | MfeI        | 72.1 |
| TRBV27                 | Forward            | CAGAAGACGGCATAACGAGATcaattgATGGGCCCCAGTCCTTG           | MfeI        | 72.7 |
| TRBV28                 | Forward            | CAGAAGACGGCATAACGAGATcaattgATGGGAATCAGGTCCTCTGTGCG     | MfeI        | 72.0 |
| TRBV29-1               | Forward            | CAGAAGACGGCATAACGAGATcaattgATGCTGAGTCTTCTGCTCCTTCTCT   | MfeI        | 71.6 |
| TRBV30                 | Forward            | CAGAAGACGGCATAACGAGATcaattgATGCTCTGCTCTCTCCTTGCCCT     | MfeI        | 72.0 |
| TRBC External          | Reverse            | GTGGCCAGGCACACCAAGTGTG                                 |             | 60.1 |
| TRBC Internal          | Reverse            | CTCTGCTTCTGATGGttgaaCACAGCGACCTCGG                     | BstBI       | 69.0 |
| TRBV Adaptor           | Forward            | CAGAAGACGGCATAACGAGATcaattgATG                         | MfeI        | 60.0 |
| TRAC cDNA              | RT                 | AGCTGGACCACAGCCG                                       |             | 50.9 |
| TRBC1 cDNA             | RT                 | GAAATCCTTCTCTTGACCATG                                  |             | 51.0 |
| TRBC2 cDNA             | RT                 | GCCTCTGGAATCCTTCTCT                                    |             | 51.7 |
| HLA SNP 1<br>rs3104413 | Forward            | CTGGGGCCCTAATAACCCTTT                                  |             | 55.2 |
| HLA SNP 1<br>rs3104413 | Reverse            | CTTTGGGAATACATTAGGATATCTATTC                           |             | 54.3 |
| HLA SNP 2<br>rs2854275 | Forward            | TTTGCTGCTATGAGGATCAAGACTTA                             |             | 55.1 |
| HLA SNP 2<br>rs2854275 | Reverse            | GCCTCTTTCAGTCACTGGAAAATG                               |             | 55.9 |
| HLA SNP 3<br>rs2854275 | Forward            | CCCAAGGAGACCTAGTTCTCCAC                                |             | 59.0 |
| HLA SNP 3<br>rs2854275 | Reverse            | CACAGGACAAATGGCAGAGCTC                                 |             | 56.9 |

\*Lower case letters within the primer sequences indicate the incorporated restriction enzyme cut sites

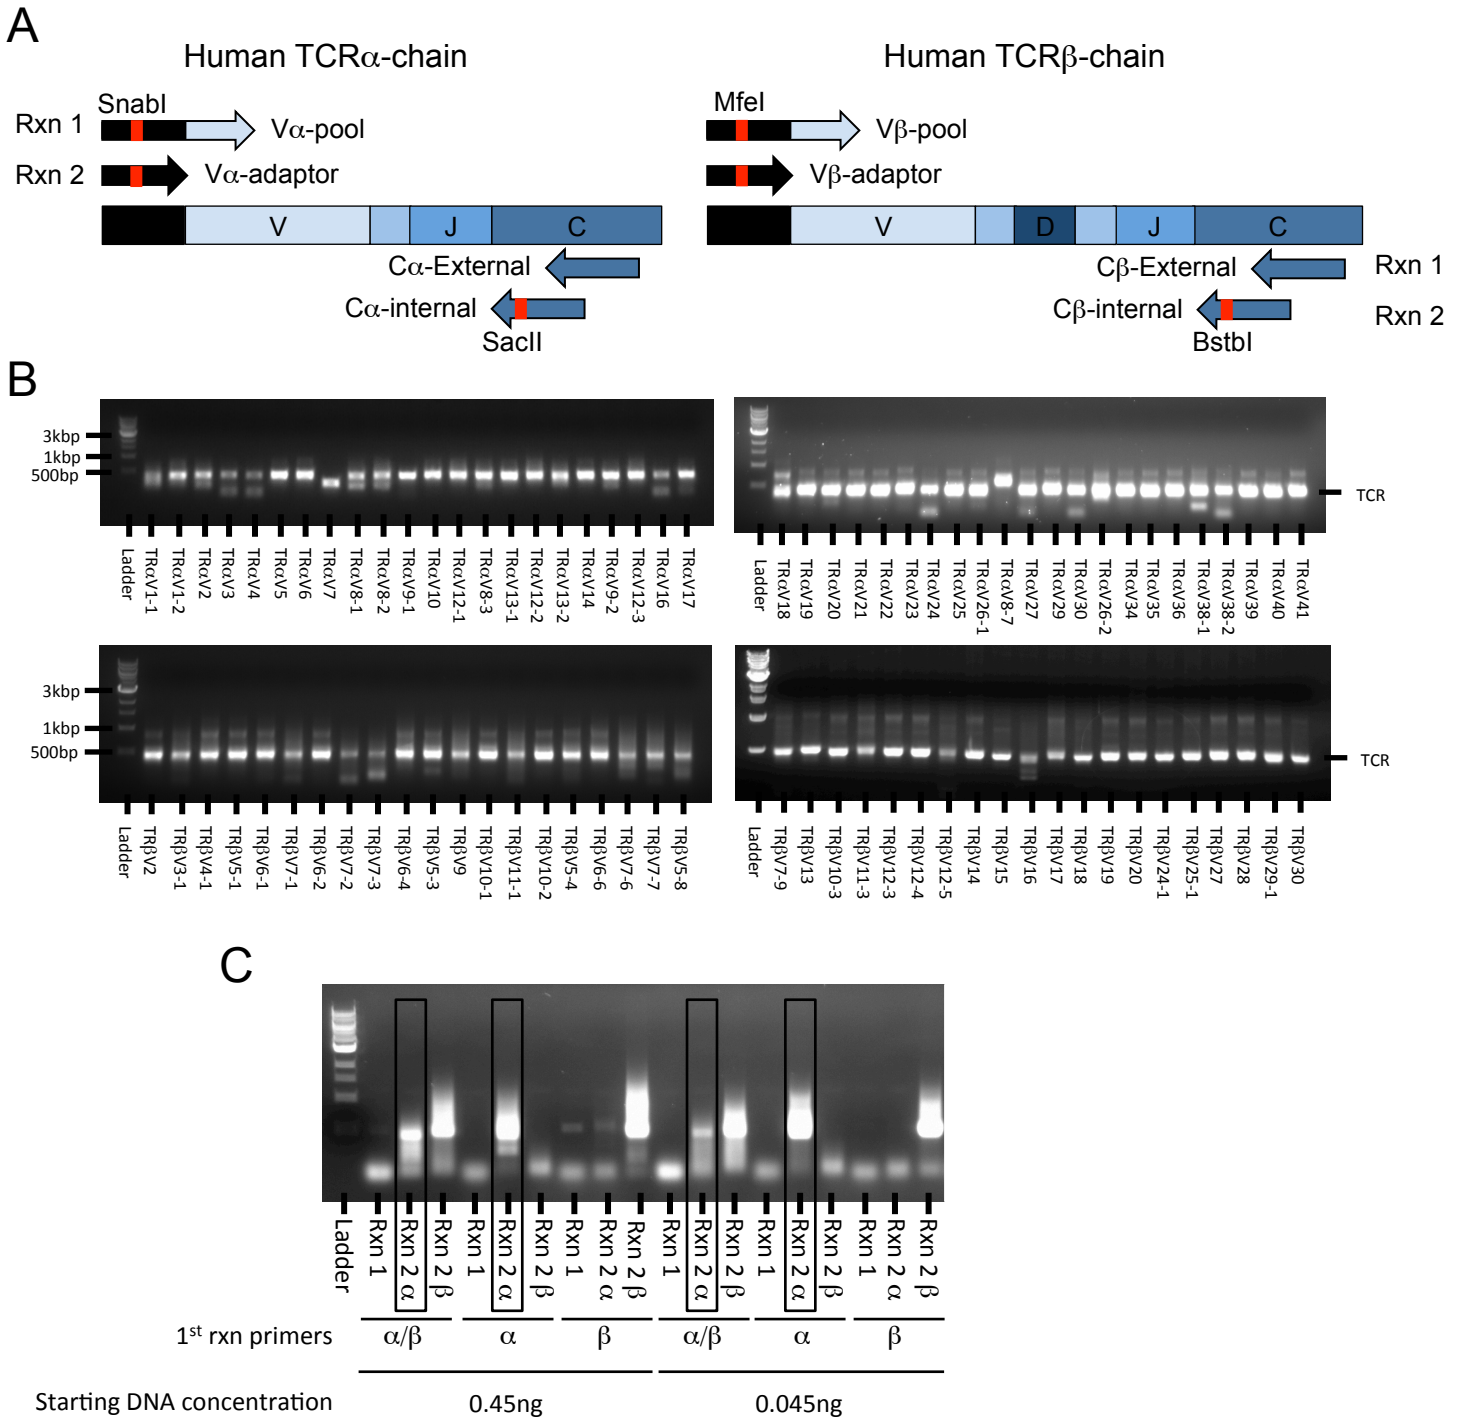

**Supplemental Fig. 1: Primer validation and PCR optimization.** (A) PCR amplification of paired TCR  $\alpha$ - and  $\beta$ -chains. Rxn 1: multiplex variable region primer pools amplify the TCR variable region from the transcription start site. During rxn 1 an adaptor sequence including a restriction enzyme cut site is incorporated into the beginning of the TCR sequence. Rxn 2: nested primers amplify the entire variable region through the beginning of the constant region where a second restriction enzyme cut site is incorporated. (B) To verify the specificity and function of each V $\alpha$ /V $\beta$  primer, primers were tested individually for their ability to amplify a specific TCR $\alpha$ / $\beta$ -chain from human PBMCs. RNA was isolated from human PBMCs using a TCR-specific reverse transcription (RT) reaction in which only TCR mRNA is reverse transcribed into cDNA. Polyclonal TCR cDNA was then used as a template for each individual variable region-specific primer. All 84 variable region-specific primers amplified a TCR sequence. About 80% of the primers amplified their specific TCR gene, and 20% resulted in amplification of a TCR gene similar in sequence to their target gene. (C) Initially the TCR  $\alpha$ - and  $\beta$ -chains were amplified together during the multiplex PCR reaction (1<sup>st</sup> rxn primers  $\alpha/\beta$ ). Amplifying the TCR chains in separate multiplex reactions resulted in a significant increase in a PCR product yield, as shown by the black rectangles.

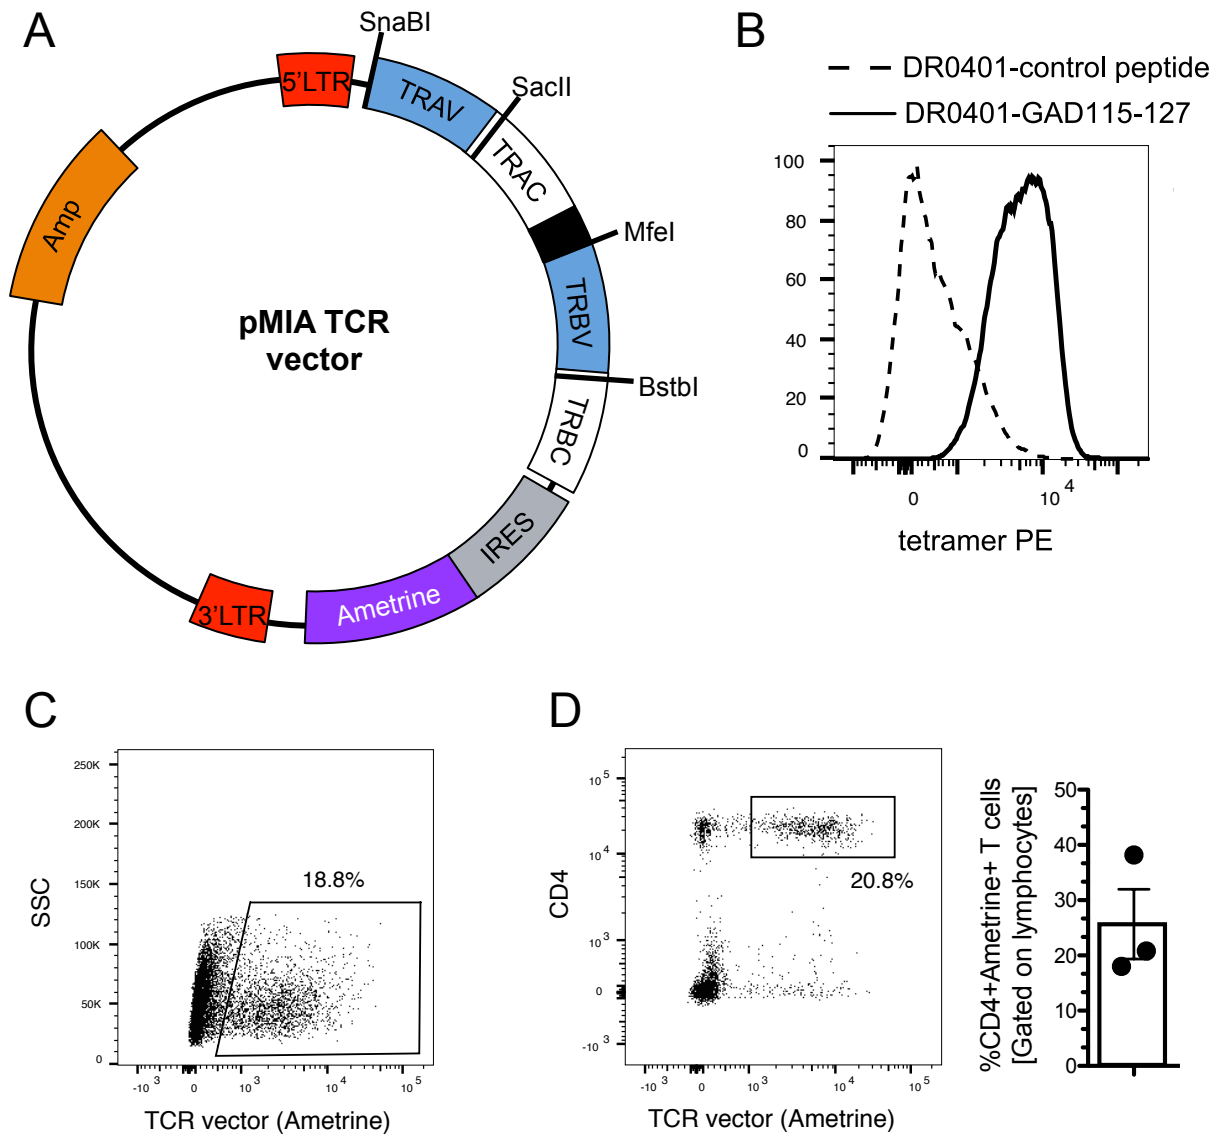

**Supplemental Fig. 2: T1D4-TCR specificity and hu-Rg mice generation.** (A) The TCR construct is encoded in a mouse stem cell virus (MSCV)-based retroviral vector containing an IRES-ametrine cassette for easy identification of construct+ cells. Human TCR variable regions (blue) were incorporated directly upstream to the corresponding mouse constant region (white). TCR  $\alpha$ - and  $\beta$ -chains were linked by a P2A peptide to allow for stoichiometric expression of both chains. (B) T1D4 TCR specificity was verified by DRB1\*0401-GAD115-127 tetramer staining of transfected HEK293T cells. (C) Bone marrow transduction efficiency prior to transfer into recipient mice. (D) Peripheral blood collected via tail vein bleed 6 weeks post-bone marrow transfer.
